# Supplementary material
Source: publisher site journal article supplement (https://www.dovepress.com/article/305838)
Supplement: Supplementary file 1 [file get_supplementary_file.php]

**Appendix 1. Search Strategy for Ovid MEDLINE**

Database: Ovid MEDLINE ALL

Database search is conducted initially on August 4, 2019, then update monthly.

There is no language restriction.

Publication dates: 1946, the starting year that the literatures are electronically searchable, to present.

Line # ׀ Search terms in MESH headings or other relevant keywords

1. “Analgesia, Epidural” or “Anesthesia, Epidural” as Subject Heading or “Epidural” as Keyword
2. “Labor, Obstetric” or “Delivery, Obstetric” or “Obstetrics” as Subject Heading or “Labor” or “Delivery” or “Obstetrics” as Keyword
3. “Bupivacaine” or “Levobupivacaine” or “Ropivacaine” as Subject Heading or “Bupivacaine” or “Levobupivacaine” or “Ropivacaine” as Keyword
4. “Clinical Trial” as Subject Heading or “Trial” or “Randomized” as Keyword
5. 1 and 2 and 3 and 4
6. Limit 5 to “Humans”

**Appendix 2 Table for Cochrane Quality Assessment**

|  | Selection bias | | Performance bias | Detection bias | Attrition bias | Reporting bias | Other bias |
| --- | --- | --- | --- | --- | --- | --- | --- |
| Study List | Random sequence generation | Allocation concealment | Blinding of participants and personnel | Blinding of outcome  assessment | Incomplete outcome data | Selective reporting | Other sources  of bias |
| Chestnut 1988 | low | low | low | low | low | low | low |
| Rodriguez 1990 | low | low | low | low | low | low | low |
| Bailey 1994 | low | low | low | low | low | low | low |
| Ferrer Gomez 2000 | low | low | unclear | unclear | low | low | low |
| Dresner 2000 | low | low | low | low | low | low | low |
| Lee 2002 | low | unclear | low | low | low | low | low |
| Reynolds 2003 | low | unclear | unclear | unclear | unclear | low | low |
| Khan 2004 | low | unclear | unclear | unclear | low | low | low |
| Gogarten 2004 | low | low | low | low | low | low | low |
